# Supplementary material for: Structural Characterization and Assessment of Anti-Inflammatory and Anti-Tyrosinase Activities of Polyphenols from Melastoma normale
Source: MDPI journal article supplement (doi:10.3390/molecules26133913), 2021-06-26
Supplement: s1 [file s1]

## Supplementary Materials

### Structural characterization and assessment of the tyrosinase activity of polyphenols from *Melastoma normale*

Rui-jie He <sup>1, 2, 3</sup>, Jun Li <sup>3</sup>, Yong-Lin Huang <sup>2, \*</sup>, Ya-Feng Wang <sup>2</sup>, Bing-yuan Yang <sup>2</sup>, Zhang-bin Liu <sup>2</sup>, Li Ge <sup>1</sup>, Ke-di Yang <sup>1, \*</sup>, Dian-Peng Li <sup>1, 2, \*</sup>

<sup>1</sup> School of Chemistry and Chemical Engineering, Guangxi University, Nanning 530004, China ; [hrj937@gxib.cn](mailto:hrj937@gxib.cn) (R.-J.H.); [49745187@qq.com](mailto:49745187@qq.com) (L.G.); [kdyang@163.com](mailto:kdyang@163.com); [ldp@gxib.cn](mailto:ldp@gxib.cn) (D.-P.L.)

<sup>2</sup> Guangxi Key Laboratory of Functional Phytochemicals Research and Utilization, Guangxi Institute of Botany, Guangxi Zhuang Autonomous Region and Chinese Academy of Sciences, Guilin 541006, China; [hyl@gxib.cn](mailto:hyl@gxib.cn) (Y.-L.H.); [wxf@gxib.cn](mailto:wxf@gxib.cn) (Y.-F.W.); [yby@gxib.cn](mailto:yby@gxib.cn) (Y.-B.Y.); [1543153384@qq.com](mailto:1543153384@qq.com) (Z.-B.L.)

<sup>3</sup> State Key Laboratory for the Chemistry and Molecular Engineering of Medicinal Resources, College of Chemistry and Pharmacy, Guangxi Normal University, Guilin 541004, China; [lijun9593@gxnu.edu.cn](mailto:lijun9593@gxnu.edu.cn) (J.L.)

\* Correspondence: [hyl@gxib.cn](mailto:hyl@gxib.cn); Tel.: +86-773-355-0829; Fax: +86-773-355-0067

Figure S1. <sup>1</sup>H NMR (500 MHz, Methanol-*d*<sub>4</sub>) spectrum of **1**

Figure S2. <sup>13</sup>C NMR (125 MHz, Methanol-*d*<sub>4</sub>) spectrum of **1**

Figure S3. HSQC spectrum of **1** in Methanol-*d*<sub>4</sub>

Figure S4. HMBC spectrum of **1** in Methanol-*d*<sub>4</sub>

Figure S5. <sup>1</sup>H-<sup>1</sup>H COSY spectrum of **1** in Methanol-*d*<sub>4</sub>

Figure S6. Roesy spectrum of **1** in Methanol-*d*<sub>4</sub>

Figure S7. HRESIMS spectrum of **1**

Figure S8. <sup>1</sup>H NMR (500 MHz, Methanol-*d*<sub>4</sub>) spectrum of **2**

Figure S9. DEPTQ (125 MHz, Methanol-*d*<sub>4</sub>) spectrum of **2**

Figure S10. HSQC spectrum of **2** in Methanol-*d*<sub>4</sub>

Figure S11. HMBC spectrum of **2** in Methanol-*d*<sub>4</sub>

Figure S12. <sup>1</sup>H-<sup>1</sup>H COSY spectrum of **2** in Methanol-*d*<sub>4</sub>

Figure S13. HRESIMS spectrum of **2**

Figure S14. <sup>1</sup>H NMR (500 MHz, Methanol-*d*<sub>4</sub>) spectrum of **3**

Figure S15. DEPTQ (125 MHz, Methanol-*d*<sub>4</sub>) spectrum of **3**

Figure S16. HSQC spectrum of **3** in Methanol-*d*<sub>4</sub>

Figure S17. HMBC spectrum of **3** in Methanol-*d*<sub>4</sub>

Figure S18. <sup>1</sup>H-<sup>1</sup>H COSY spectrum of **3** in Methanol-*d*<sub>4</sub>

Figure S19. HRESIMS spectrum of **3**

Figure S20. <sup>1</sup>H NMR (500 MHz, Methanol-*d*<sub>4</sub>) spectrum of **4**

Figure S21. DEPTQ (125 MHz, Methanol-*d*<sub>4</sub>) spectrum of **4**

Figure S22. HSQC spectrum of **4** in Methanol-*d*<sub>4</sub>

Figure S23. HMBC spectrum of **4** in Methanol-*d*<sub>4</sub>

Figure S24. <sup>1</sup>H-<sup>1</sup>H COSY spectrum of **4** in Methanol-*d*<sub>4</sub>

Figure S25. HRESIMS spectrum of **4**

Figure S26. CD spectrum of **1–4**

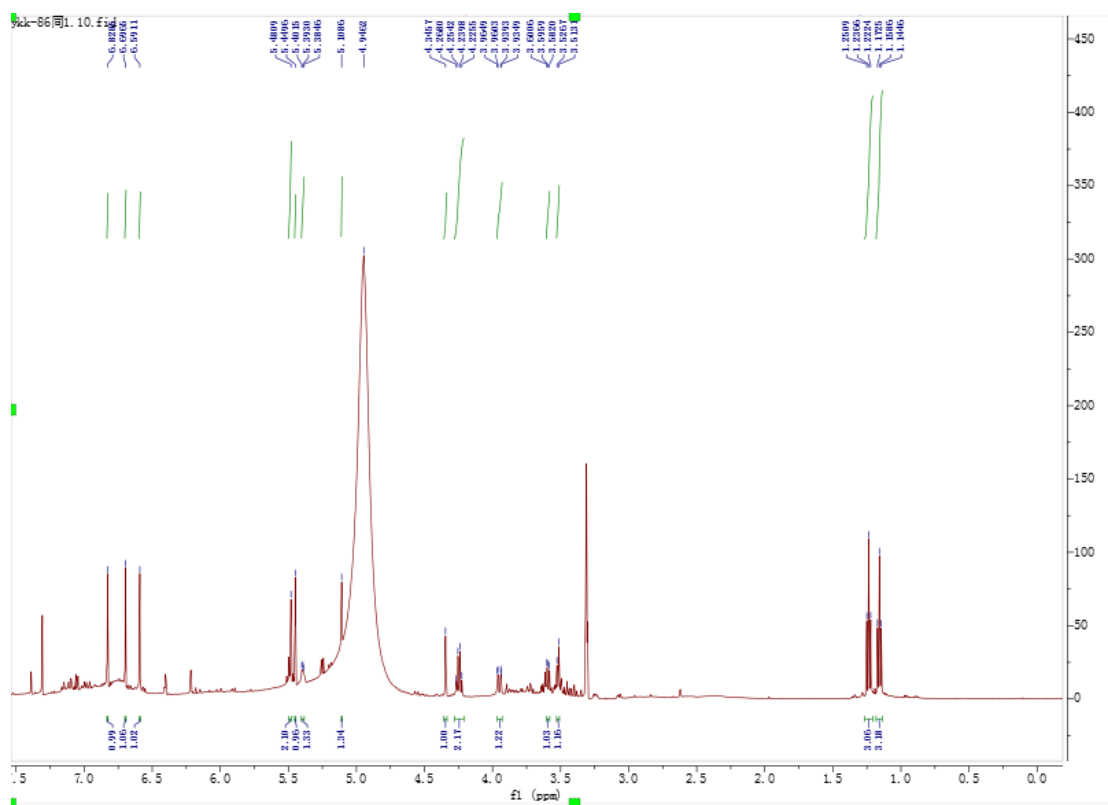

Figure S1. <sup>1</sup>H NMR (500 MHz, Methanol-*d*<sub>4</sub>) spectrum of 1

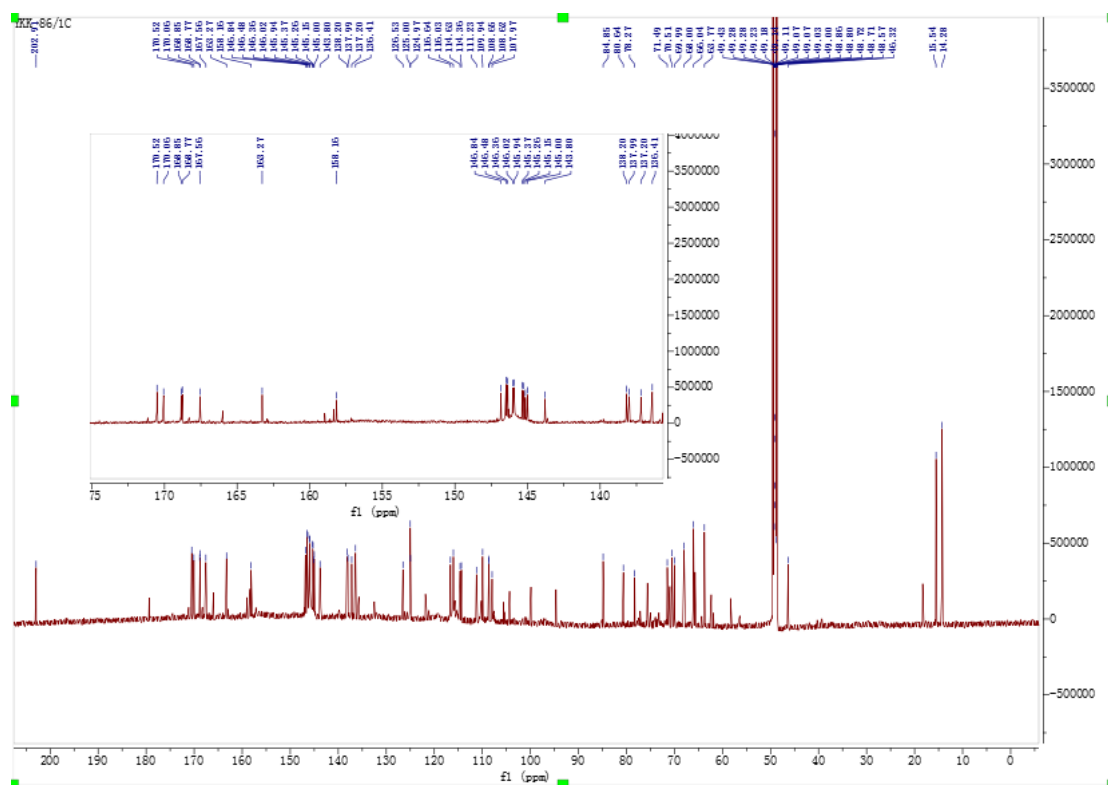

Figure S2. <sup>13</sup>C NMR (125 MHz, Methanol-*d*<sub>4</sub>) spectrum of 1

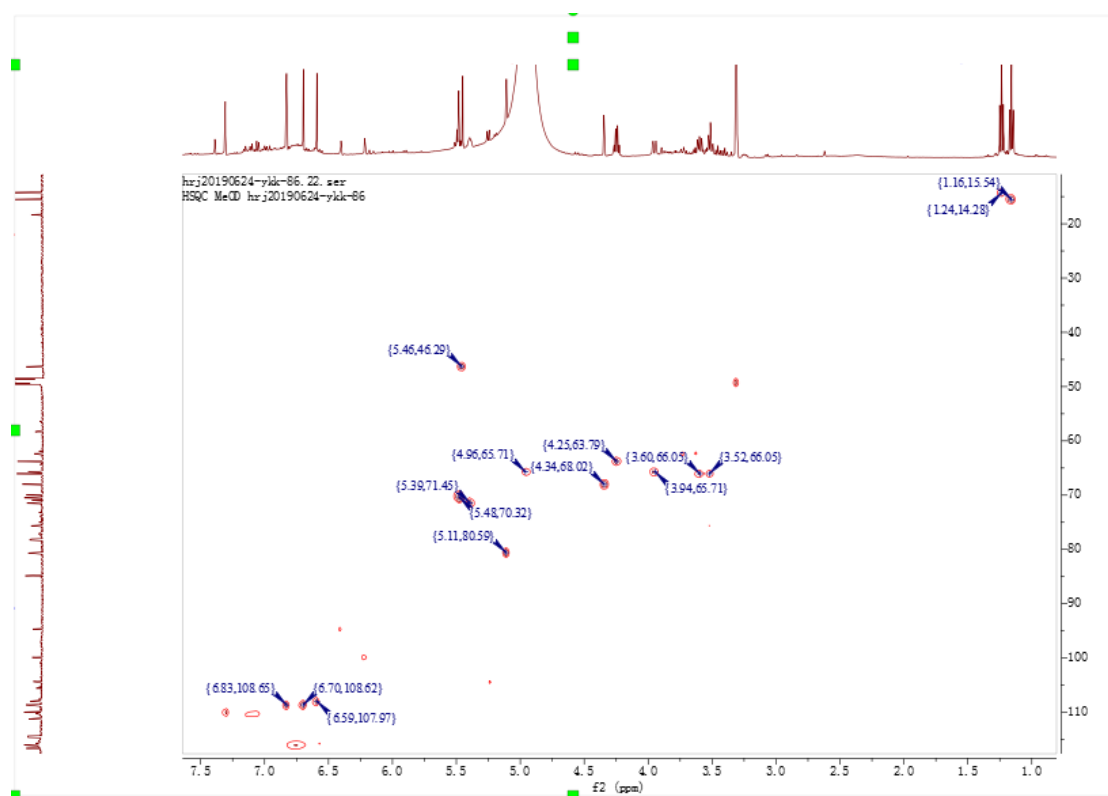

Figure S3. HSQC spectrum of **1** in Methanol- $d_4$

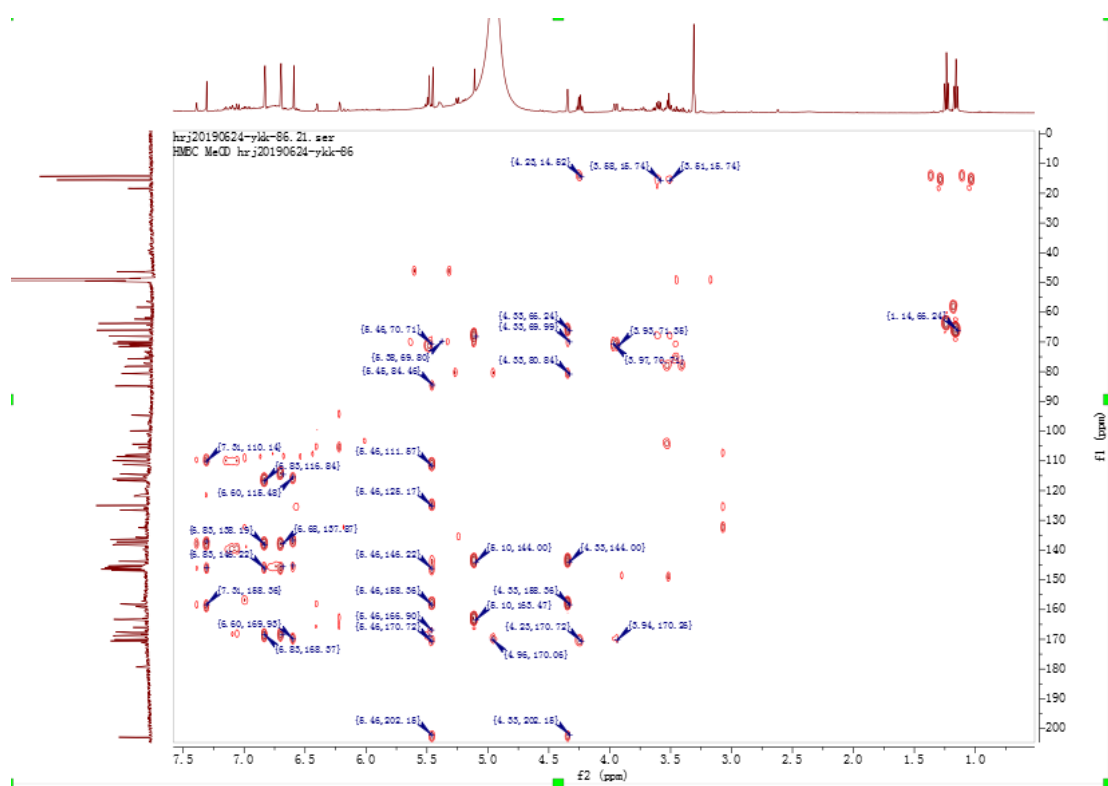

Figure S4. HMBC spectrum of **1** in Methanol- $d_4$

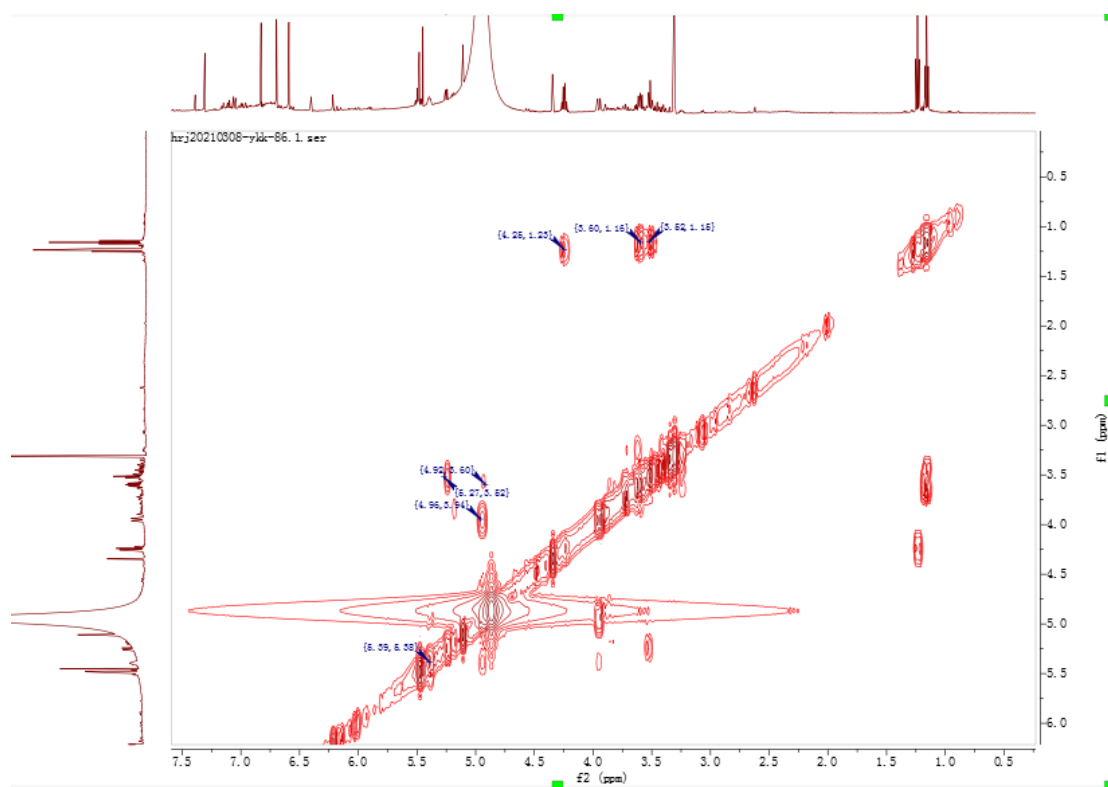

Figure S5.  $^1\text{H}$ - $^1\text{H}$  COSY spectrum of **1** in Methanol- $d_4$

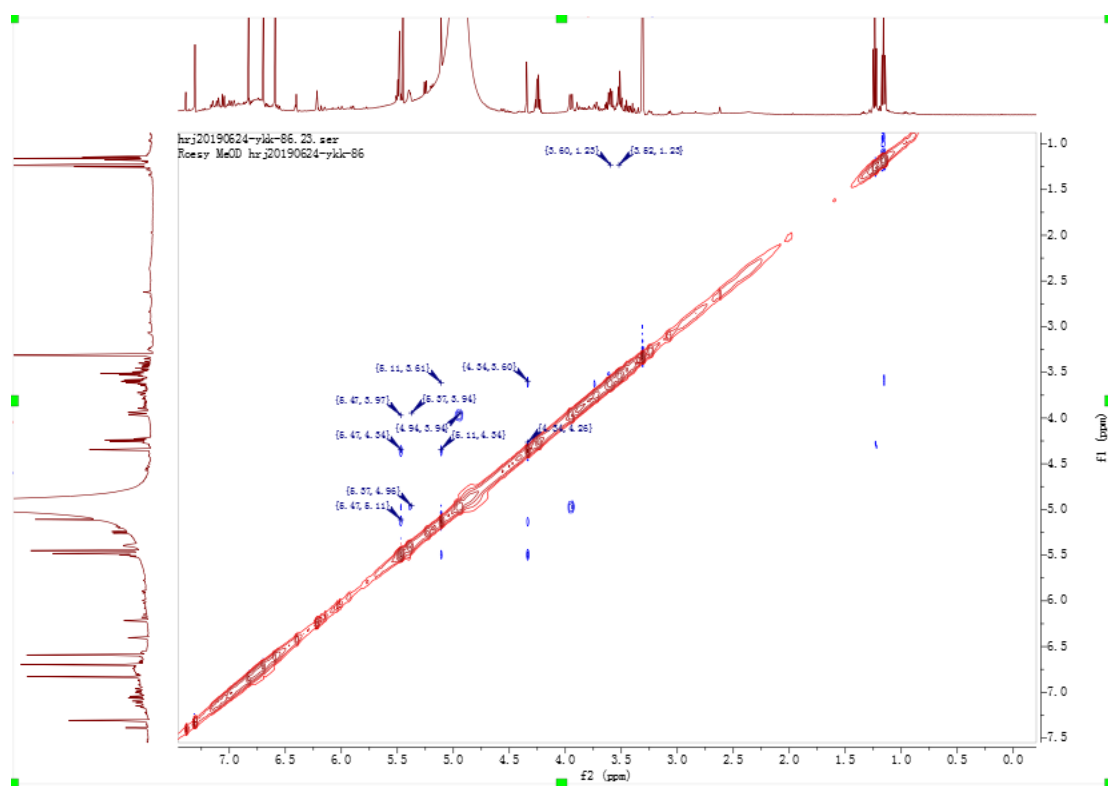

Figure S6. Roesy spectrum of **1** in Methanol- $d_4$

| Elmt | Val. | Min | Max | Elmt | Val. | Min | Max | Use Adduct |
|------|------|-----|-----|------|------|-----|-----|------------|
| H    | 1    | 1   | 100 | O    | 2    | 1   | 100 | H          |
| C    | 4    | 1   | 100 | S    | 2    | 0   | 0   |            |
| N    | 3    | 0   | 0   |      |      |     |     |            |

Error Margin (ppm): 50  
 HC Ratio: 0.1 - 4.0  
 Max Isotopes: all  
 MSn Iso RI (%): 75.00

DBE Range: 1.0 - 50.0  
 Apply N Rule: no  
 Isotope RI (%): 1.00  
 MSn Logic Mode: AND

Electron Ions: both  
 Use MSn Info: no  
 Isotope Res: 10000  
 Max Results: 500

Event#: 4 MS(E-) Ret. Time : 22.277 Scan#: 2552

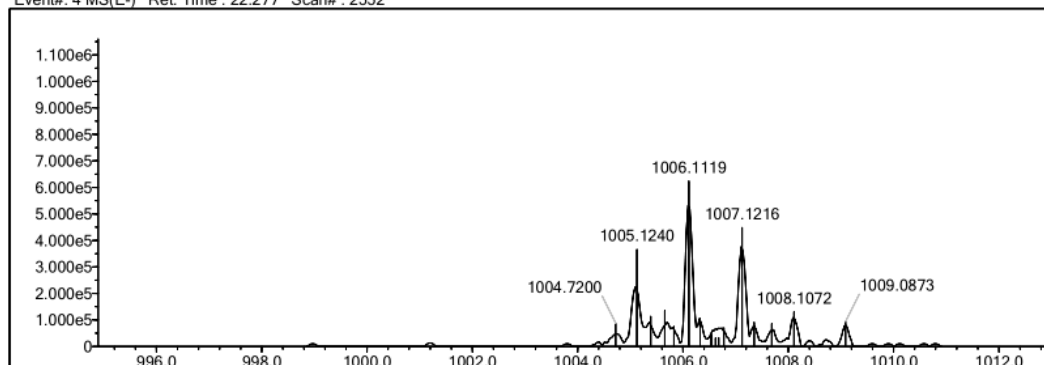

| Rank | Score | Formula (M) | Ion    | Meas. m/z | Pred. m/z | DBE  | Df. (ppm) | Iso   | Meas. (M) |
|------|-------|-------------|--------|-----------|-----------|------|-----------|-------|-----------|
| 2    | 18.75 | C45 H34 O27 | [M-H]- | 1005.1240 | 1005.1215 | 29.0 | 2.49      | 19.48 | 1006.1313 |

Figure S7. HRESIMS spectrum of 1

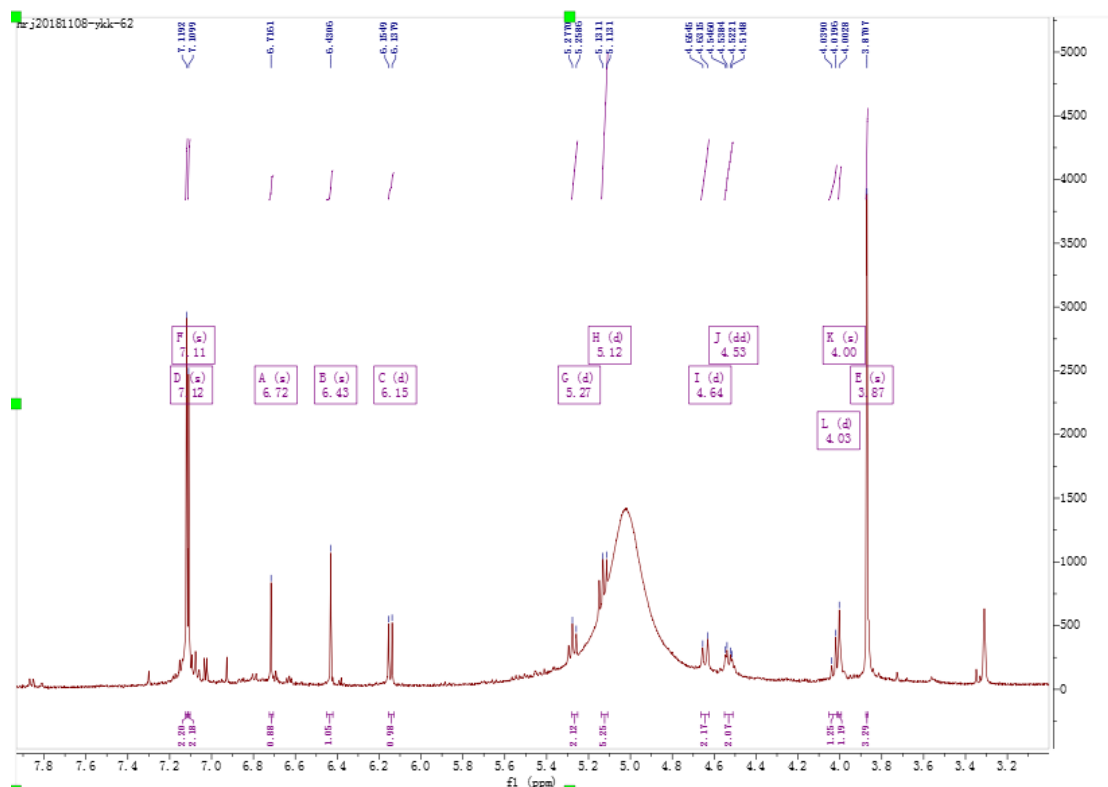

Figure S8. <sup>1</sup>H NMR (500 MHz, Methanol-*d*<sub>4</sub>) spectrum of 2

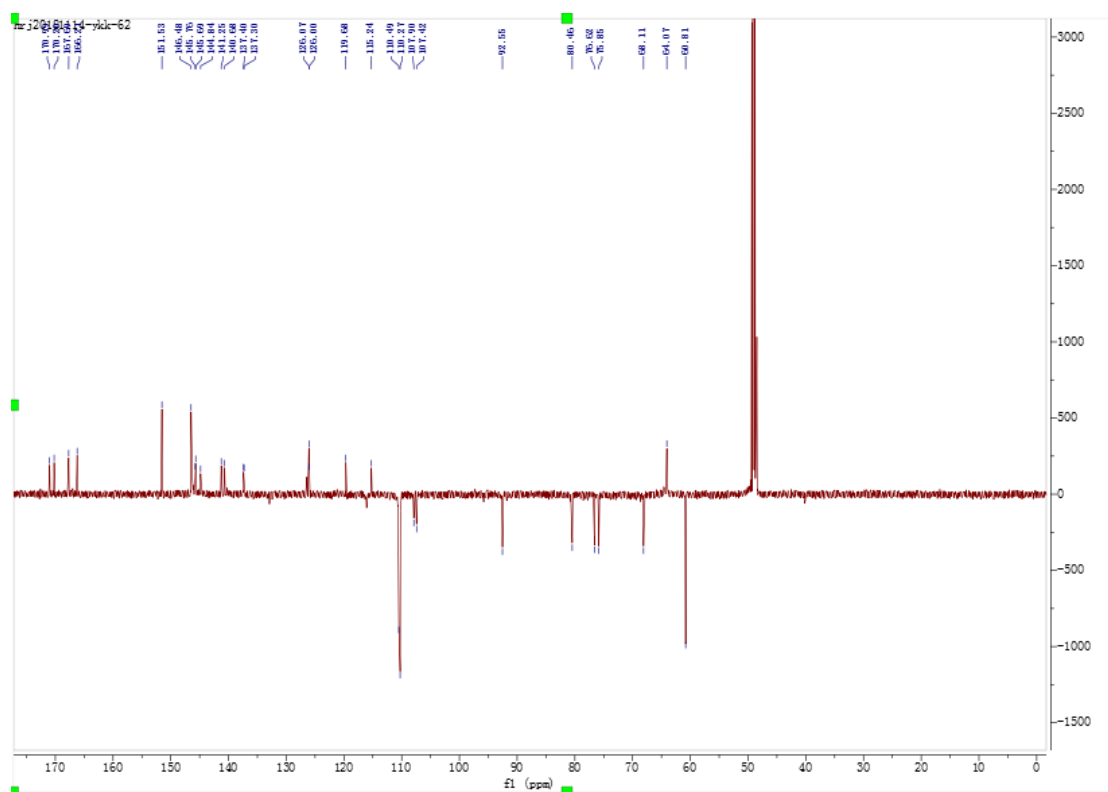

Figure S9. DEPTQ (125 MHz, Methanol- $d_4$ ) spectrum of **2**

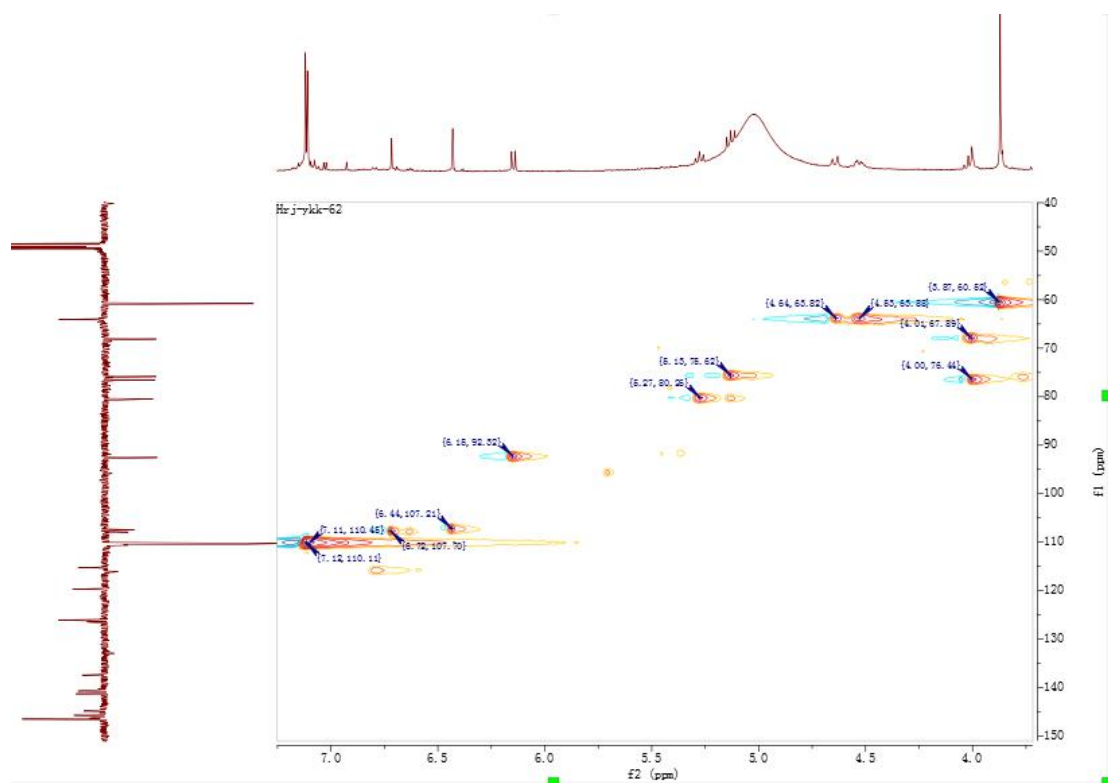

Figure S10. HSQC spectrum of **2** in Methanol- $d_4$

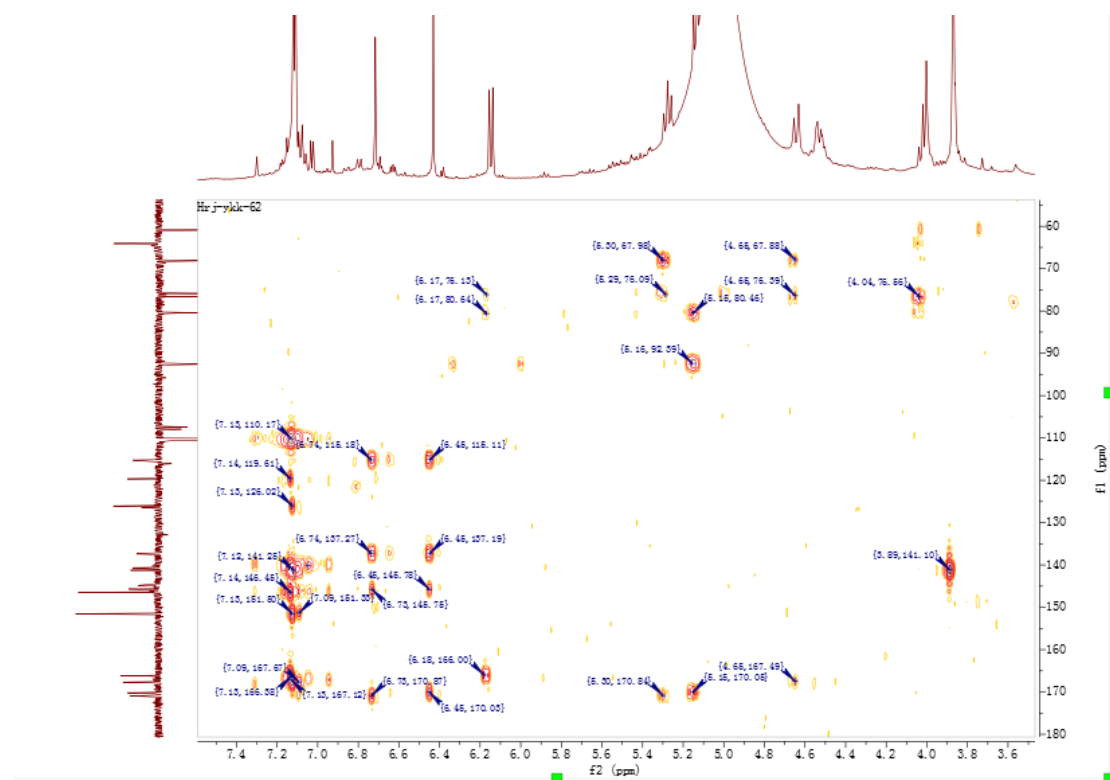

Figure S11. HMBC spectrum of **2** in Methanol-*d*<sub>4</sub>

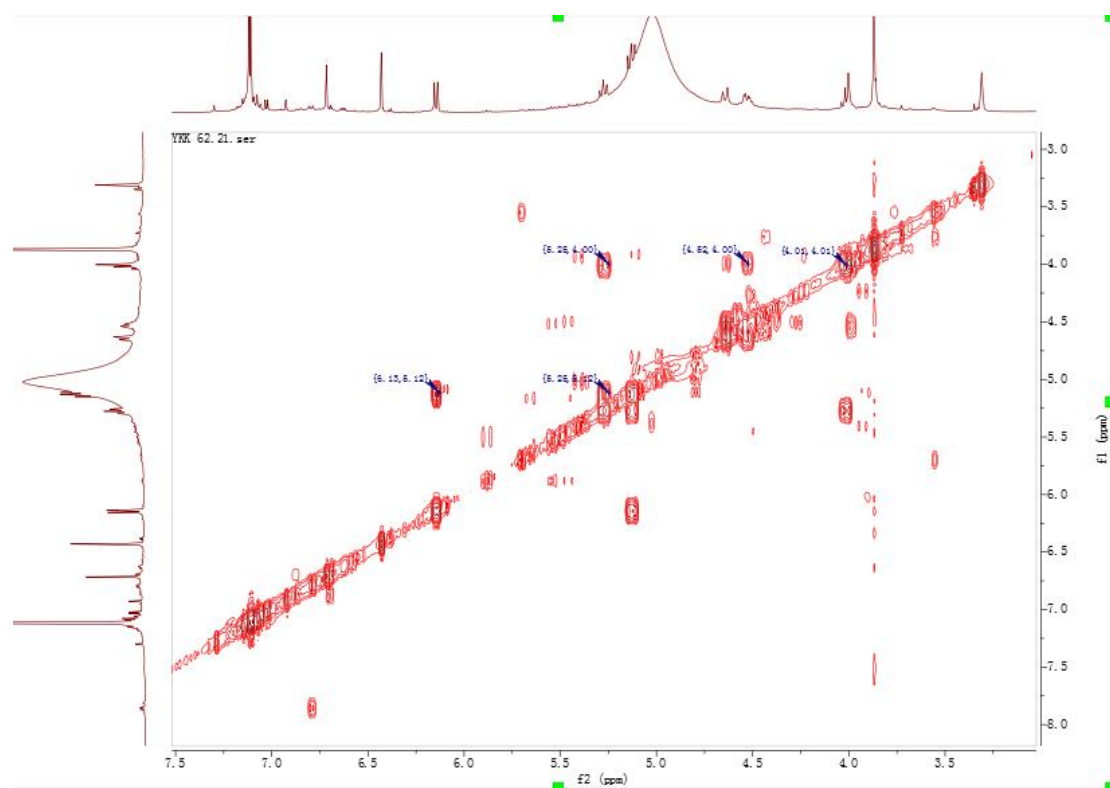

Figure S12. <sup>1</sup>H-<sup>1</sup>H COSY spectrum of **2** in Methanol-*d*<sub>4</sub>

|                        |                       |                     |
|------------------------|-----------------------|---------------------|
| Error Margin (ppm): 50 | DBE Range: 1.0 - 50.0 | Electron Ions: both |
| HC Ratio: 0.1 - 4.0    | Apply N Rule: no      | Use MSn Info: no    |
| Max Isotopes: all      | Isotope RI (%): 1.00  | Isotope Res: 10000  |
| MSn Iso RI (%): 75.00  | MSn Logic Mode: AND   | Max Results: 500    |

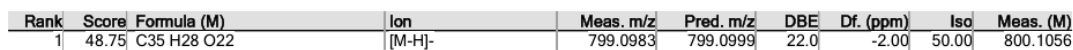

**1H NMR Spectrum Data:**

| Chemical Shift (ppm) | Integration |
|----------------------|-------------|
| 7.2462               | 0.95        |
| 7.2438               | 2.00        |
| 7.2388               | 1.00        |
| 7.2043               | 1.00        |
| 6.7025               | 1.05        |
| 6.4260               | 1.17        |
| 6.3374               | 1.29        |
| 6.3204               | 1.29        |
| 5.2568               | 1.35        |
| 5.2474               | 1.26        |
| 5.2432               | 1.05        |
| 5.2370               | 1.11        |
| 5.1095               | 1.05        |
| 5.0929               | 1.11        |
| 4.7065               | 1.05        |
| 4.6971               | 1.26        |
| 4.6929               | 1.05        |
| 4.4446               | 1.05        |
| 3.9328               | 1.05        |
| 3.9282               | 1.11        |
| 3.7799               | 1.05        |
| 3.5686               | 1.11        |
| 3.5575               | 1.05        |
| 3.3847               | 1.05        |

Figure S14.  $^1\text{H}$  NMR (500 MHz, Methanol- $d_4$ ) spectrum of **3**



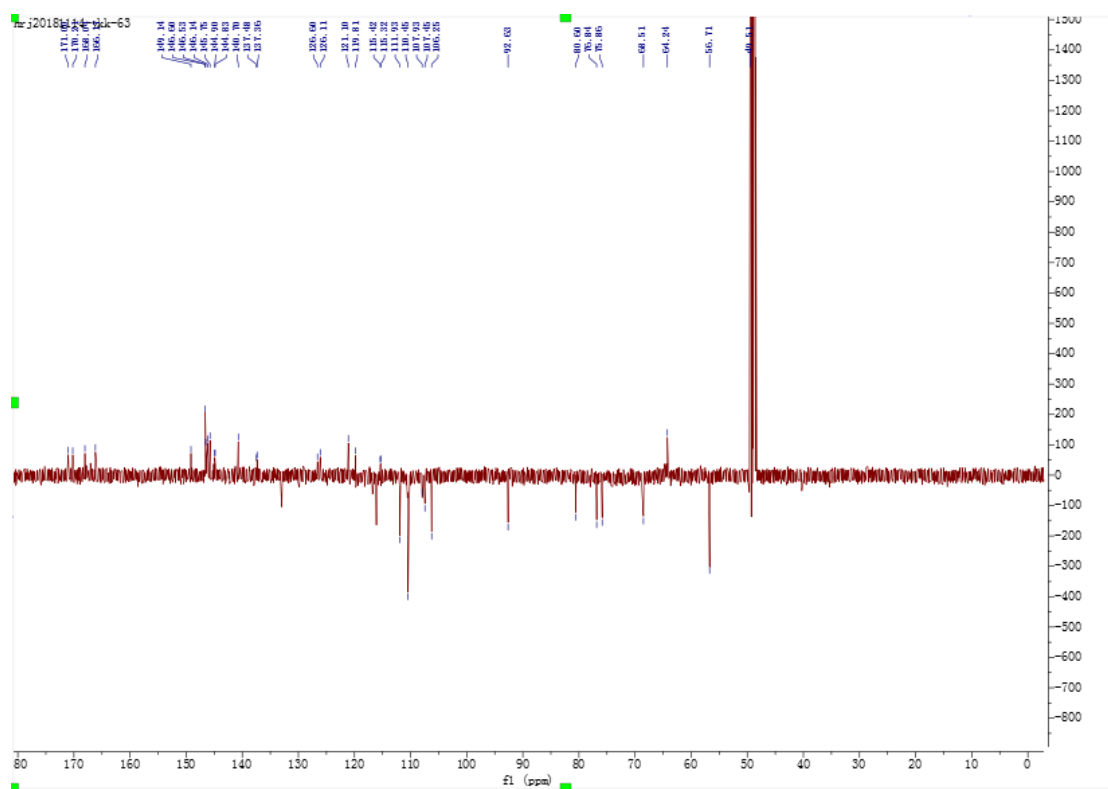

Figure S15. DEPTQ (125 MHz, Methanol- $d_4$ ) spectrum of **3**

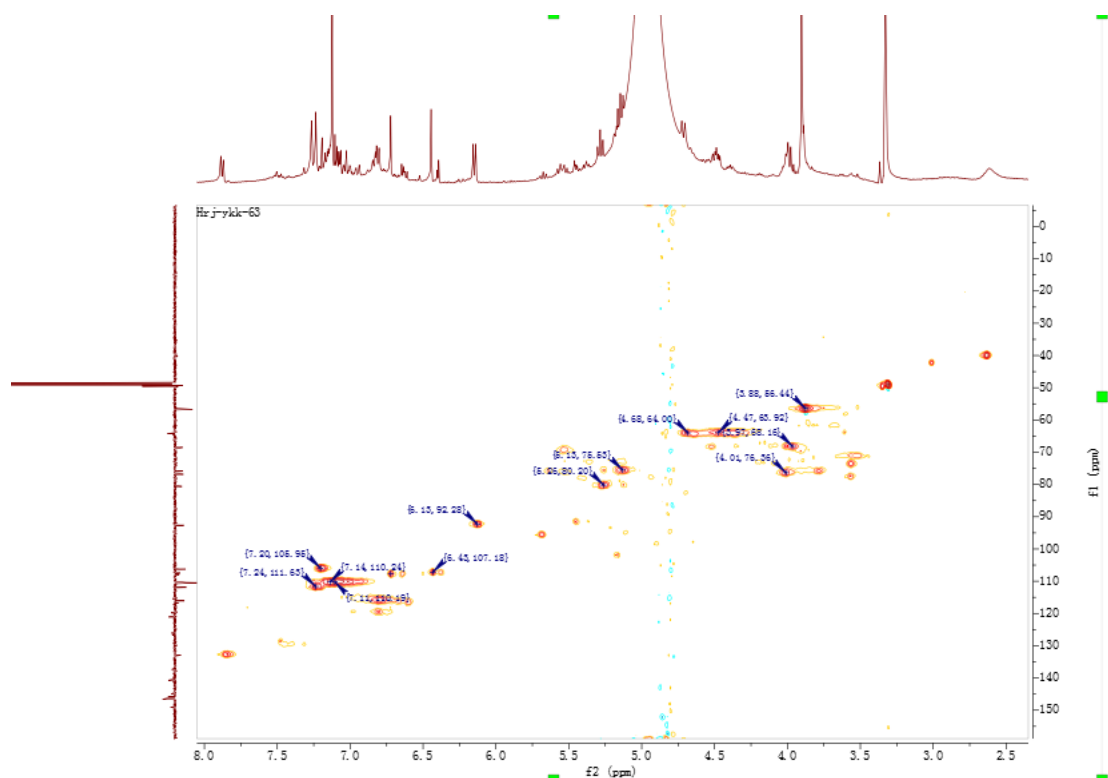

Figure S16. HSQC spectrum of **3** in Methanol- $d_4$

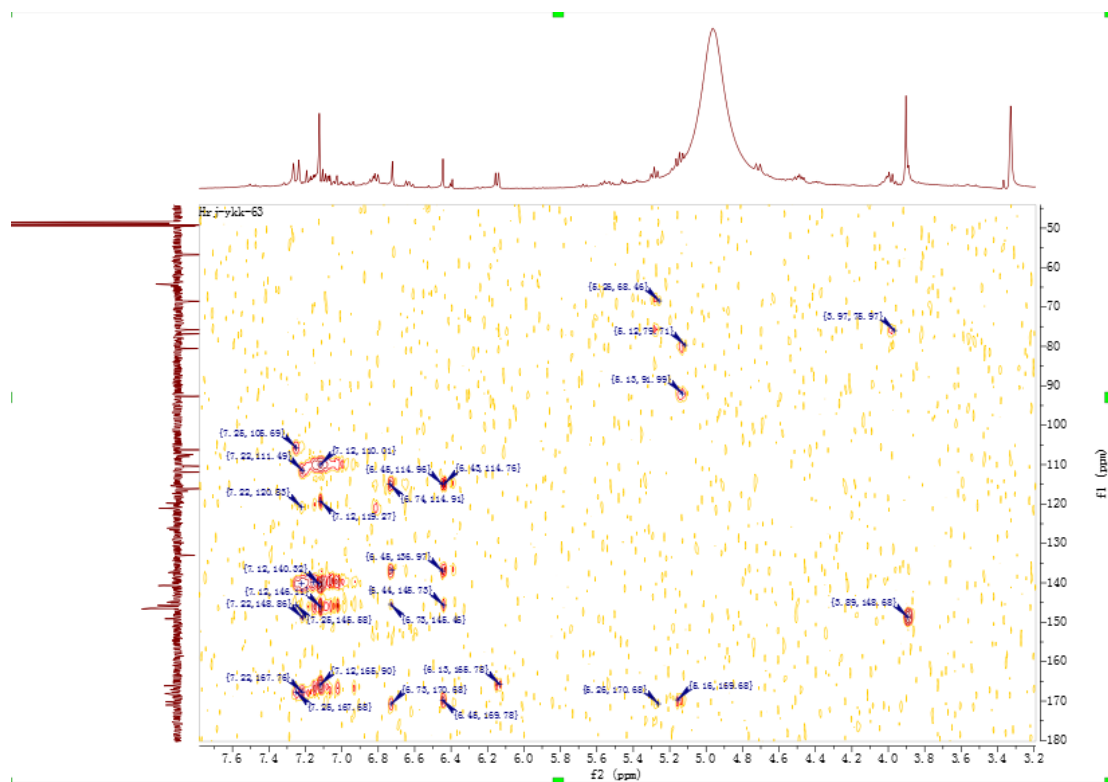

Figure S17. HMBC spectrum of **3** in Methanol-*d*<sub>4</sub>

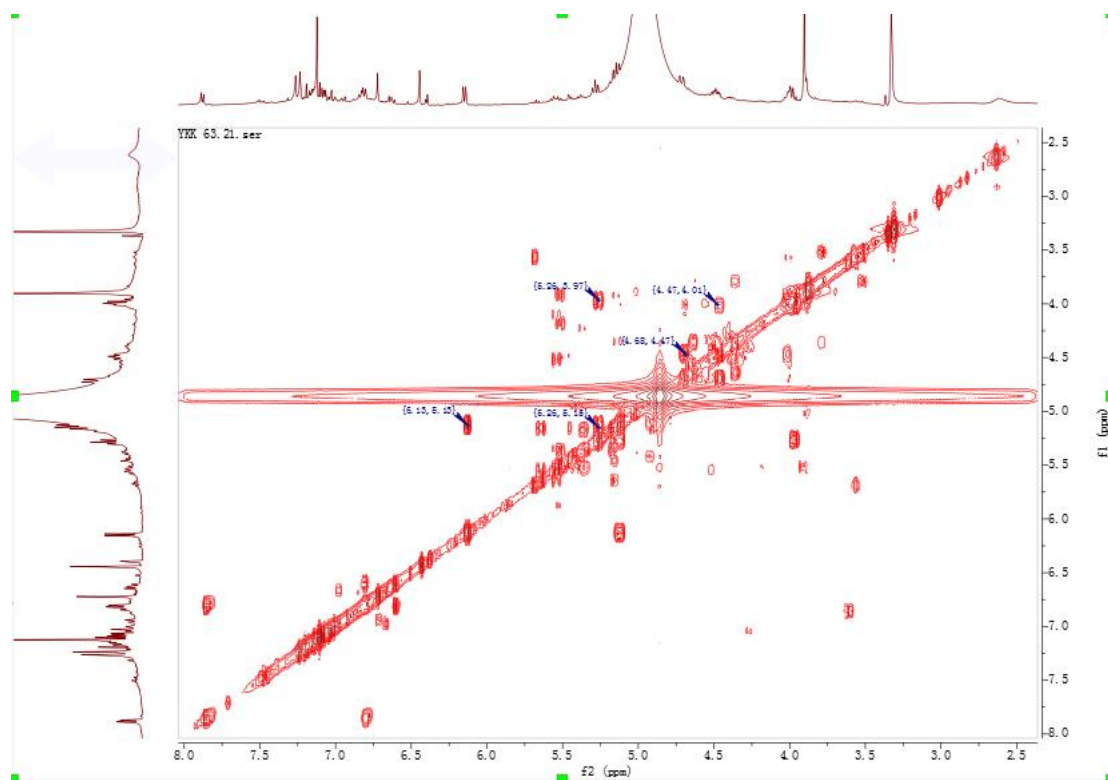

Figure S18. <sup>1</sup>H-<sup>1</sup>H COSY spectrum of **3** in Methanol-*d*<sub>4</sub>

Data File: F:\黄永林&何瑞杰课题组\HRJ-YKK-63.lcd

| Elmt | Val. | Min | Max | Elmt | Val. | Min | Max | Use Adduct |
|------|------|-----|-----|------|------|-----|-----|------------|
| H    | 1    | 1   | 100 | O    | 2    | 1   | 100 | H          |
| C    | 4    | 1   | 100 | S    | 2    | 0   | 0   |            |
| N    | 3    | 0   | 0   |      |      |     |     |            |

Error Margin (ppm): 50  
 HC Ratio: 0.1 - 4.0  
 Max Isotopes: all  
 MSn Iso RI (%): 75.00

DBE Range: 1.0 - 50.0  
 Apply N Rule: no  
 Isotope RI (%): 1.00  
 MSn Logic Mode: AND

Electron Ions: both  
 Use MSn Info: no  
 Isotope Res: 10000  
 Max Results: 500

Event#: 4 MS(E-) Ret. Time : 12.633 Scan#: 1474

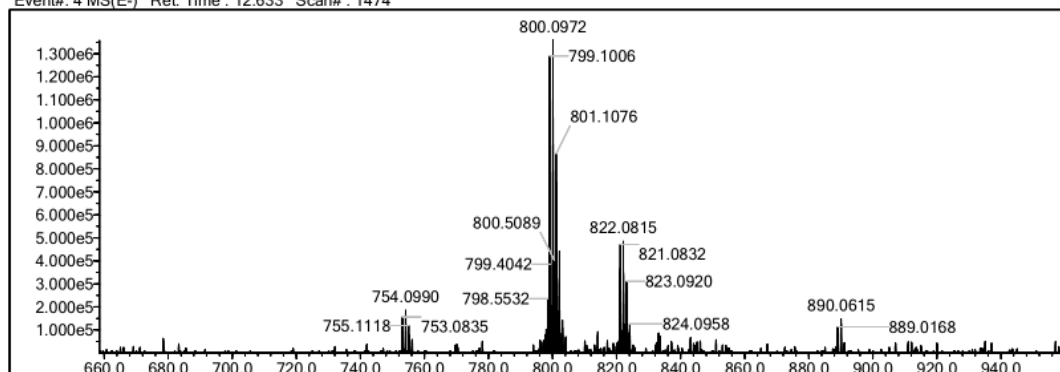

| Rank | Score | Formula (M) | Ion    | Meas. m/z | Pred. m/z | DBE  | Df. (ppm) | Iso   | Meas. (M) |
|------|-------|-------------|--------|-----------|-----------|------|-----------|-------|-----------|
| 1    | 46.30 | C35 H28 O22 | [M-H]- | 799.1006  | 799.0999  | 22.0 | 0.88      | 46.30 | 800.1079  |

Figure S19. HRESIMS spectrum of **3**

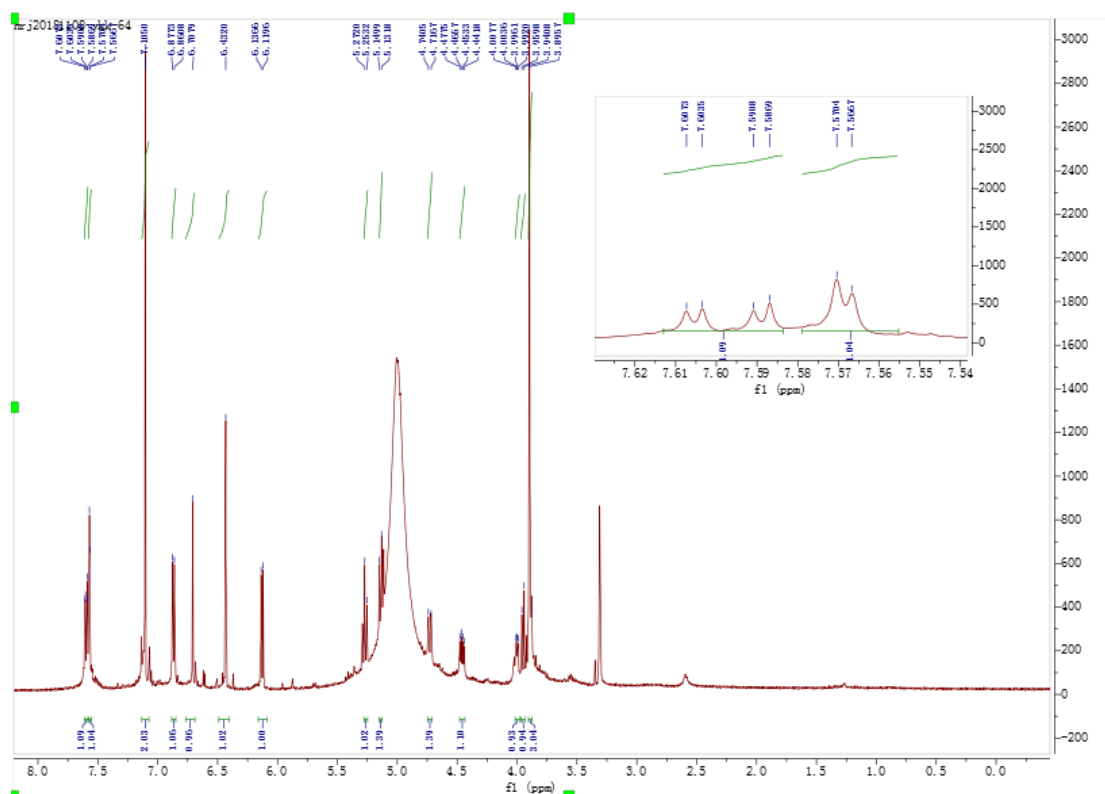

Figure S20.  $^1\text{H}$  NMR (500 MHz, Methanol- $d_4$ ) spectrum of **4**

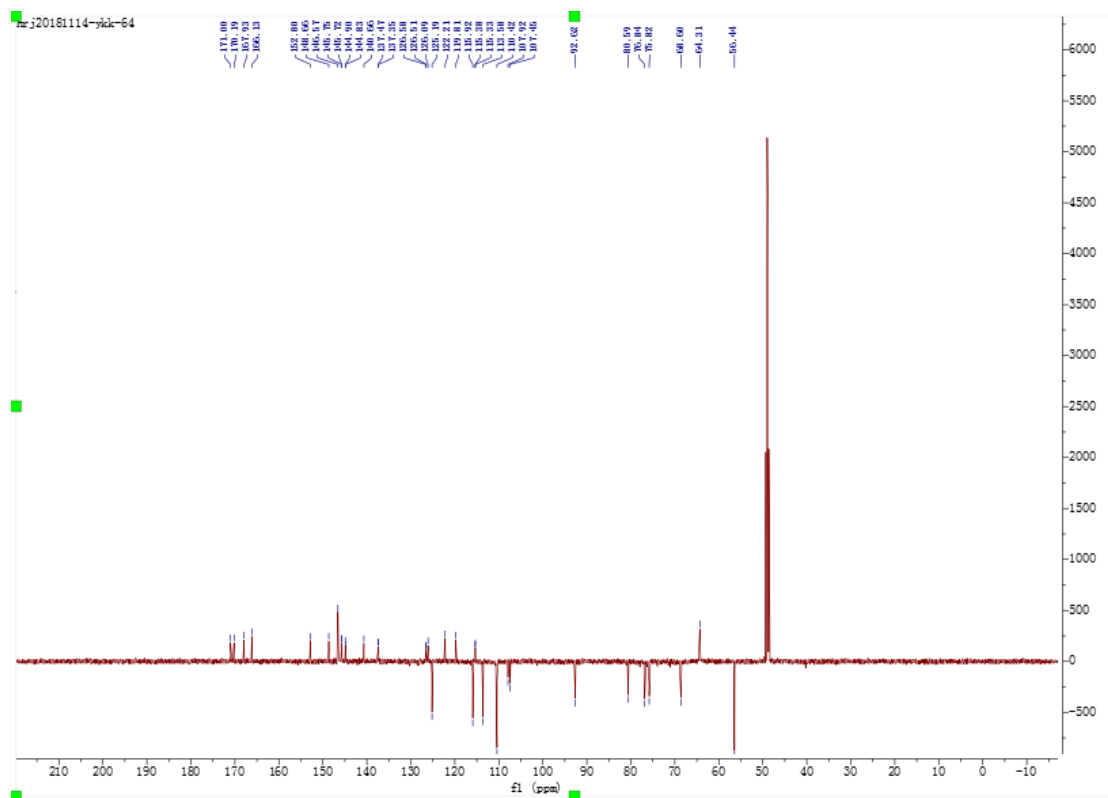

Figure S21. DEPTQ (125 MHz, Methanol- $d_4$ ) spectrum of **4**

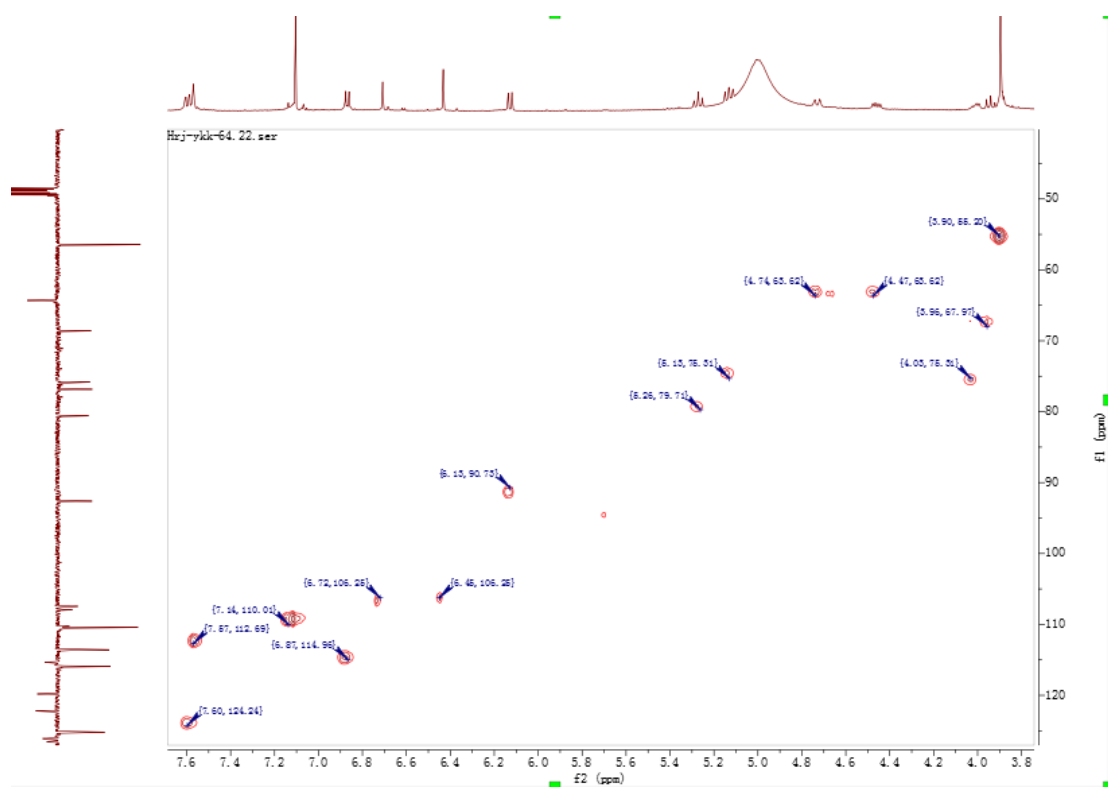

Figure S22. HSQC spectrum of **4** in Methanol- $d_4$

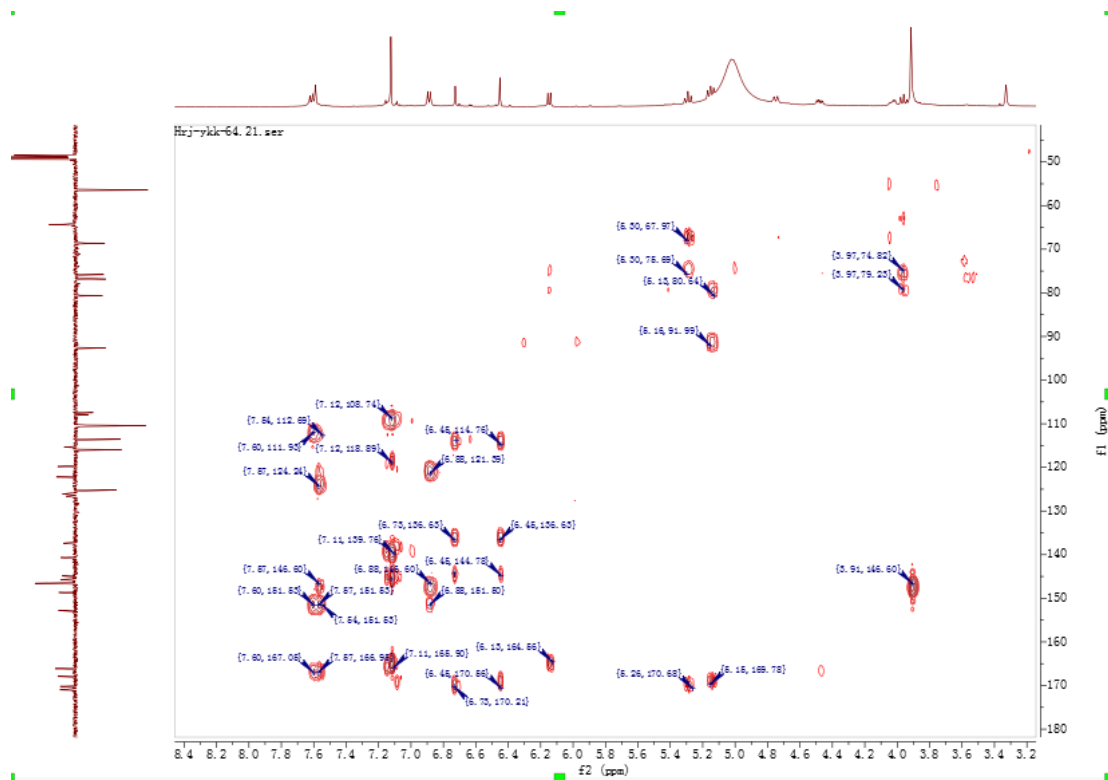

Figure S23. HMBC spectrum of **4** in Methanol- $d_4$

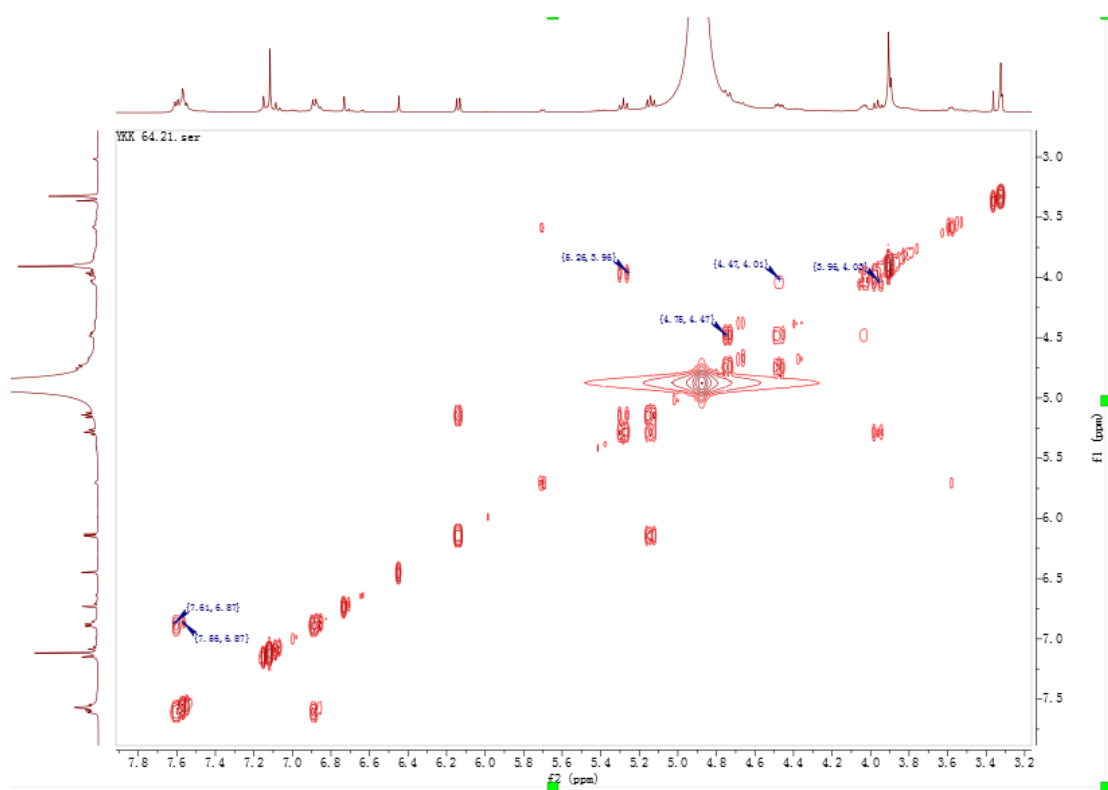

Figure S24.  $^1\text{H}$ - $^1\text{H}$  COSY spectrum of **4** in Methanol- $d_4$

| Elmt | Val. | Min | Max | Elmt | Val. | Min | Max | Use Adduct |
|------|------|-----|-----|------|------|-----|-----|------------|
| H    | 1    | 1   | 100 | O    | 2    | 1   | 100 | H          |
| C    | 4    | 1   | 100 | S    | 2    | 0   | 0   |            |
| N    | 3    | 0   | 0   |      |      |     |     |            |

Error Margin (ppm): 50

HC Ratio: 0.1 - 4.0

Max Isotopes: all

MSn Iso RI (%): 75.00

DBE Range: 1.0 - 50.0

Apply N Rule: no

Isotope RI (%): 1.00

MSn Logic Mode: AND

Electron Ions: both

Use MSn Info: no

Isotope Res: 10000

Max Results: 500

Event#: 4 MS(E-) Ret. Time : 0.760 Scan# : 90

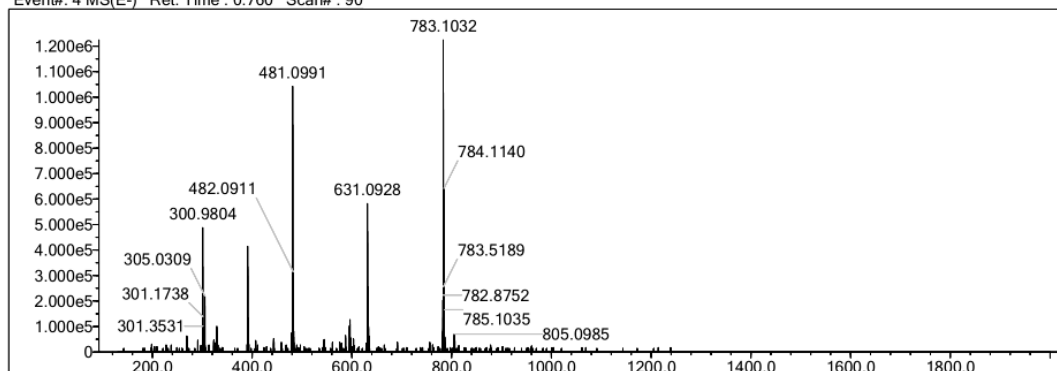

| Rank | Score | Formula (M) | Ion    | Meas. m/z | Pred. m/z | DBE  | Df. (ppm) | Iso   | Meas. (M) |
|------|-------|-------------|--------|-----------|-----------|------|-----------|-------|-----------|
| 2    | 54.38 | C35 H28 O21 | [M-H]- | 783.1032  | 783.1050  | 22.0 | -2.30     | 56.21 | 784.1105  |

Figure S25. HRESIMS spectrum of **4**

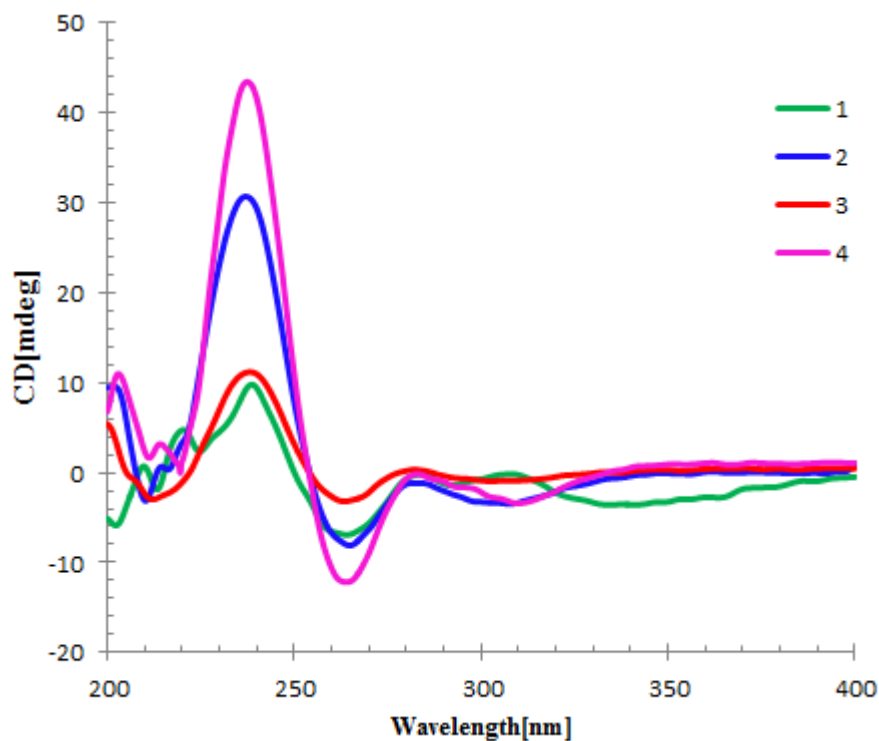

Figure S26. CD spectrum of **1–4**
